# Supplementary material for: Mepolizumab for Prednisone-Dependent Asthma with Sputum Eosinophilia
Source: Atypon-hosted journal article supplement (doi:10.1056/nejmoa0805435), 2009-03-04

## Supplementary Appendix

This appendix has been provided by the authors to give readers additional information about their work.

Supplement to: Nair P, Pizzichini MMM, Kjarsgaard M, et al. Mepolizumab for prednisone-dependent asthma with sputum eosinophilia. *N Engl J Med* 2009;360:985-93.

## Online supplement

### Table of contents

|                                                                                                              |    |
|--------------------------------------------------------------------------------------------------------------|----|
| Methods .....                                                                                                | 2  |
| Table 1 (individual patient data confirming asthma diagnosis .....                                           | 4  |
| Table 2 (prednisone dose at beginning and end of study) .....                                                | 5  |
| Table 3 (details of individual exacerbations) .....                                                          | 6  |
| Table 4A (sputum differential cell count before & after treatment with mepolizumab: subgroup analysis) ..... | 8  |
| Table 4B (sputum differential cell count before & after treatment with placebo: subgroup analysis) .....     | 9  |
| Table 4C (blood differential cell count before & after treatment with mepolizumab: subgroup analysis).....   | 10 |
| Table 4D (blood differential cell count before & after treatment with placebo: subgroup analysis) .....      | 11 |
| Figure 1 (time to exacerbation: subgroup analysis) .....                                                     | 12 |
| Figure 2 (correlation between blood and sputum eosinophils: subgroup analysis) .....                         | 13 |
| Figure 3a (change in FEV1 before and after treatment: subgroup analysis) .....                               | 14 |
| Figure 3b (change in FEV1 percent predicted before and after treatment: subgroup analysis) .....             | 15 |
| Figure 3c (change in ACQ before and after treatment: subgroup analysis) .....                                | 16 |

## Methods

### Patients

At the time of the study, seven of the patients (4 in the mepolizumab arm and 3 in the placebo arm) had normal methacholine airway responsiveness (PC20 >16 mg/ml) despite persistence of symptoms with prednisone withdrawal. Airway responsiveness or bronchodilator reversibility was not checked in nine subjects (4 in the active arm and 5 in the placebo arm) either because the FEV1 was too low or because of reluctance on our part to withhold long acting inhaled  $\beta$ 2-agonists to obtain a pre-bronchodilator FEV1 measurement.

### Blinding

Drs FEH and PN did all the clinical assessments. MK did all the clinical measurements. AE did all the sputum measurements. Patients were recruited from our clinics. Sputum was induced by MK (clinical lab) and sent to AE (sputum lab). AE would call FEH or PN to let us know if the sputum eos was greater than 3% in which case the patients were randomized. Neither FEH or PN saw the results.

At each visit, MK would induce sputum and send it to AE. Melanie, FEH or PN were not told of the results. They continued with the steroid reduction according to schedule. If the patient developed clinical criteria of exacerbation, there were 4 possibilities for the sputum counts: 1) eosinophilia, 2) neutrophilia suggestive of bacterial infection (>15 million and 80% neutrophil), 3) neutrophilia not suggestive of bacterial infection (<15 million and 80% neutrophil) and 4) normal cell counts.

If the sputum lab detected a neutrophilia likely to be a bacterial infection (option 2), FEH or PN were informed about it and they would treat with antibiotic, and continue with the steroid reduction protocol. **If the exacerbation was associated with eosinophilia, or with a neutrophilia not**

**likely to be due to bacterial infection or with normal cell counts, FEH or PN were not informed of the sputum cell counts.** They followed the protocol, withdrew patients and treated them with prednisone. Blood eosinophil counts results were also kept away from both FEH and PN.

Thus the investigators were not able to guess the treatment allocations based on sputum or blood eosinophil counts.

Table 1 (online): Individual patient data confirming asthma diagnosis

| PATIENTS           | Year of onset of symptoms | Year of prednisone dependence | History prior to randomization                   |                           |                                                         |                                           | At randomization       |                                | Current Reversibility ml (%) | Outcome in the study |
|--------------------|---------------------------|-------------------------------|--------------------------------------------------|---------------------------|---------------------------------------------------------|-------------------------------------------|------------------------|--------------------------------|------------------------------|----------------------|
|                    |                           |                               | Confirmed exacerbations in preceding 3 years (n) | Date of last exacerbation | Max fall in FEV <sub>1</sub> , ml (%) with exacerbation | Max reversibility, ml (%) with salbutamol | Sputum Eosinophils (%) | FEV <sub>1</sub> (% predicted) |                              |                      |
| <b>Mepolizumab</b> |                           |                               |                                                  |                           |                                                         |                                           |                        |                                |                              |                      |
| 01                 | 2002                      | 2004                          | 9                                                | Aug-05                    | 1260 (50%)                                              | 260 (19%)                                 | 42.3                   | 60%                            | No follow-up                 | Completed            |
| 02*                | 1995                      | 2006                          | 6                                                | May-06                    | 1050 (25%)                                              | 130 (4%)                                  | 25.5                   | 95%                            | 40 (1%)                      | Completed            |
| 03                 | 1993                      | 2002                          | 4                                                | Mar-05                    | 1860 (69%)                                              | 260 (30%)                                 | 21.0                   | 68%                            | 130 (7%)                     | Completed            |
| 04                 | 1970                      | 1985                          | >10                                              | Mar-04                    | 300 (29%)                                               | 210 (25%)                                 | 10.7                   | 34%                            | 210 (24%)                    | Completed            |
| 05                 | 2005                      | 2005                          | 13                                               | Dec-05                    | 2420 (65%)                                              | 530 (18%)                                 | 12.3                   | 63%                            | 520 (17%)                    | Completed            |
| 06**               | 1996                      | 1996                          | 19                                               | Nov-04                    | 1100 (37%)                                              | 70 (4%)                                   | 54.3                   | 55%                            | 130 (5%)                     | Completed            |
| 07                 | 1979                      | 1999                          | 6                                                | Apr-06                    | 670 (29%)                                               | 480 (29%)                                 | 16.6                   | 85%                            | 70 (2%)                      | Completed            |
| 08                 | 1968                      | 1983                          | 3                                                | Jun-05                    | 900 (47%)                                               | 210 (21%)                                 | 6.0                    | 65%                            | 70 (6%)                      | Withdrawn            |
| 09                 | 1999                      | 2004                          | 7                                                | Jun-05                    | 500 (38%)                                               | 470 (37%)                                 | 1.7%                   | 44%                            | 460 (42%)                    | Not analyzed         |
| <b>Placebo</b>     |                           |                               |                                                  |                           |                                                         |                                           |                        |                                |                              |                      |
| 01                 | 1993                      | 1999                          | 13                                               | Oct-04                    | 1750 (60%)                                              | 710 (53%)                                 | 3.3                    | 45%                            | 200 (17%)                    | Completed            |
| 02                 | Unknown                   | 2004                          | 6                                                | Jun-05                    | 1650 (57%)                                              | 300 (22%)                                 | 4.0                    | 87%                            | 460 (28%)                    | Completed            |
| 03                 | 1986                      | 2005                          | 19                                               | Aug-05                    | 890 (28%)                                               | 350 (18%)                                 | 3.6                    | 71%                            | Deceased                     | Exacerbated          |
| 04                 | 2001                      | 2006                          | 9                                                | Mar-06                    | 1600 (47%)                                              | 550 (29%)                                 | 4.6                    | 73%                            | 550 (29%)                    | Exacerbated          |
| 05                 | 1995                      | 1999                          | 8                                                | May-05                    | 2610 (56%)                                              | 580 (18%)                                 | 4.7                    | 91%                            | 420 (14%)                    | Exacerbated          |
| 06                 | 1997                      | 2001                          | 13                                               | Jan-06                    | 860 (45%)                                               | 280 (29%)                                 | 3.2                    | 39%                            | 350 (37%)                    | Exacerbated          |
| 07                 | 1981                      | 1995                          | 9                                                | Sep-05                    | 1100 (48%)                                              | 420 (24%)                                 | 6.0                    | 67%                            | 200 (13%)                    | Exacerbated          |
| 08                 | 2000                      | 2004                          | 5                                                | Nov-04                    | 950 (37%)                                               | 340 (21%)                                 | 4.5                    | 83%                            | 30 (1%)                      | Exacerbated          |
| 09                 | 2004                      | 2005                          | 4                                                | Jun-05                    | 1100 (35%)                                              | 510 (24%)                                 | 35.3                   | 60%                            | 370 (15%)                    | Exacerbated          |
| 10                 | 1973                      | 2005                          | 13                                               | Jun-05                    | 690 (38%)                                               | 240 (22%)                                 | 3.7                    | 64%                            | 140 (13%)                    | Exacerbated          |
| 11                 | 1994                      | 1999                          | 13                                               | Jan-06                    | 2160 (51%)                                              | 470 (16%)                                 | +++ granules           | 88%                            | 310 (9%)                     | Not analyzed         |

\* PC<sub>20</sub> methacholine 3.2 mg/ml, \*\*PC<sub>20</sub> methacholine 2.0 mg/ml

Table 2 (online): Prednisone dose at the beginning and at the end of the study. The two patients who were not included in the sub-group analysis (protocol violators) are indicated in red.

| <b>Patients</b>    | <b>Starting dose<br/>(mg)</b> | <b>Lowest dose<br/>without<br/>exacerbation<br/>(mg)</b> | <b>Minimum<br/>possible dose<br/>according to<br/>protocol<br/>(mg)</b> | <b><i>% of maximum<br/>possible reduction</i></b> |
|--------------------|-------------------------------|----------------------------------------------------------|-------------------------------------------------------------------------|---------------------------------------------------|
| <b>Mepolizumab</b> |                               |                                                          |                                                                         |                                                   |
| <b>01</b>          | <b>15</b>                     | <b>5</b>                                                 | <b>5</b>                                                                | <b><i>100</i></b>                                 |
| <b>02</b>          | <b>5</b>                      | <b>0</b>                                                 | <b>0</b>                                                                | <b><i>100</i></b>                                 |
| <b>03</b>          | <b>5</b>                      | <b>0</b>                                                 | <b>0</b>                                                                | <b><i>100</i></b>                                 |
| <b>04</b>          | <b>10</b>                     | <b>2.5</b>                                               | <b>2.5</b>                                                              | <b><i>100</i></b>                                 |
| <b>05</b>          | <b>25</b>                     | <b>7.5</b>                                               | <b>5</b>                                                                | <b><i>87.5</i></b>                                |
| <b>06</b>          | <b>20</b>                     | <b>5</b>                                                 | <b>5</b>                                                                | <b><i>100</i></b>                                 |
| <b>07</b>          | <b>10</b>                     | <b>2.5</b>                                               | <b>2.5</b>                                                              | <b><i>100</i></b>                                 |
| <b>08</b>          | <b>10</b>                     | <b>5</b>                                                 | <b>2.5</b>                                                              | <b><i>66.7</i></b>                                |
| <b>09</b>          | <b>7.5</b>                    | <b>7.5</b>                                               | <b>0</b>                                                                | <b><i>0</i></b>                                   |
| <b>Placebo</b>     |                               |                                                          |                                                                         |                                                   |
| <b>01</b>          | <b>17.5</b>                   | <b>5</b>                                                 | <b>5</b>                                                                | <b><i>100</i></b>                                 |
| <b>02</b>          | <b>5</b>                      | <b>0</b>                                                 | <b>0</b>                                                                | <b><i>100</i></b>                                 |
| <b>03</b>          | <b>12.5</b>                   | <b>5</b>                                                 | <b>2.5</b>                                                              | <b><i>75</i></b>                                  |
| <b>04</b>          | <b>12.5</b>                   | <b>12.5</b>                                              | <b>2.5</b>                                                              | <b><i>0</i></b>                                   |
| <b>05</b>          | <b>10</b>                     | <b>5</b>                                                 | <b>2.5</b>                                                              | <b><i>66.7</i></b>                                |
| <b>06</b>          | <b>10</b>                     | <b>5</b>                                                 | <b>2.5</b>                                                              | <b><i>66.7</i></b>                                |
| <b>07</b>          | <b>5</b>                      | <b>5</b>                                                 | <b>0</b>                                                                | <b><i>0</i></b>                                   |
| <b>08</b>          | <b>10</b>                     | <b>5</b>                                                 | <b>2.5</b>                                                              | <b><i>66.7</i></b>                                |
| <b>09</b>          | <b>20</b>                     | <b>20</b>                                                | <b>5</b>                                                                | <b><i>0</i></b>                                   |
| <b>10</b>          | <b>2.5</b>                    | <b>2.5</b>                                               | <b>0</b>                                                                | <b><i>0</i></b>                                   |
| <b>11</b>          | <b>12.5</b>                   | <b>7.5</b>                                               | <b>2.5</b>                                                              | <b><i>50</i></b>                                  |

Table 3 (online): Details of all exacerbations, withdrawn due to protocol violation (1 each in each treatment arm) and withdrawn due to adverse event (1 in the active group). Exacerbations associated with sputum neutrophilia are indicated in bold and the corresponding visit with an \*. The table has the following information: a) treatment group b) exacerbation visit c) prednisone dose at exacerbation d) FEV1 e) FEV1 % predicted f) FEV1/VC g) FEV1 post bd h) Likert composite score i) Likert cough score j) ACQ k) SABA: total number of puffs of salbutamol for the two days previous to the visit l) Sputum TCC m) Sputum Eos% n) Sputum N % o) Blood eos (absolute) p) criterion(a) used to define exacerbation

**Any blank cells in SEOS or SNEU = missing/no DCC. Criteria to define exacerbation: Symptoms (nocturnal symptoms or albuterol use 4 or more puffs over baseline for two consecutive days or 2 unit change in cough score) or 15% change in FEV1 or both**

|                    | B                  | C    | D          | E           | F         | G         | H           | I         | J        | K           | L        | M           | N           | O           | P            |                             |
|--------------------|--------------------|------|------------|-------------|-----------|-----------|-------------|-----------|----------|-------------|----------|-------------|-------------|-------------|--------------|-----------------------------|
| Placebo<br>Subject | EXAC               | V#   | PRED       | FEV1        | F%PD      | FEVVC     | FEV BD      | LKRT      | CGH      | ACQ         | SABA     | TCC         | SEOS        | SNEU        | BEOS         | CRITERIA                    |
| 1                  | V6                 | 1    | 2.5        | 1.15        | 64        | 55        | 1.20        | 35        | 7        | 0.57        | 0        | 2.0         | 3.7         | 76.0        | 135.2        | FEV1<br>Nocturnal<br>wheeze |
|                    |                    | 2    | 2.5        | 1.05        | 58        | 59        | 1.23        | 34        | 6        | 0.71        | 0        | 15.6        | 9.3         | 69.3        | 223.1        |                             |
|                    |                    | 5    | 0.0        | 0.99        | 55        | 56        | 1.21        | 34        | 7        | 0.71        | 0        | 14.7        | 8.0         | 52.3        | 558.0        |                             |
|                    |                    | 6    | 0.0        | 0.94        | 52        | 59        | 1.10        | 33        | 6        | 0.71        | 4        | 15.0        | 18.7        | 39.3        | 589.3        |                             |
| 2                  | V7*<br>V10*<br>V11 | 1    | 12.5       | 2.78        | 71        | 73        | 2.87        | 33        | 7        | 0.86        | 0        | 4.4         | 3.6         | 74.4        | 558.0        | FEV1<br>SABA<br>Cough       |
|                    |                    | 2    | 12.5       | 2.49        | 64        | 64        | 2.47        | 33        | 7        | 1.10        | 0        | 13.0        | 12.8        | 68.4        | 338.0        |                             |
|                    |                    | 7    | <b>5.0</b> | <b>2.1</b>  | <b>54</b> | <b>75</b> | <b>2.11</b> | <b>18</b> | <b>3</b> | <b>4.3</b>  | <b>6</b> | <b>37.5</b> | <b>1.0</b>  | <b>92.7</b> | <b>561.6</b> |                             |
|                    |                    | 10   | <b>2.5</b> | <b>2.38</b> | <b>61</b> | <b>71</b> | <b>2.33</b> | <b>31</b> | <b>6</b> | <b>1.60</b> | <b>4</b> | <b>32.9</b> | <b>14.4</b> | <b>82.0</b> | <b>846.0</b> |                             |
| 3                  | V8                 | 11   | 2.5        | 2.16        | 56        | 76        | 2.37        | 21        | 4        | 2.70        | 8        | 10.1        | 63.7        | 22.0        | 1040.3       |                             |
|                    |                    | 1    | 10.0       | 3.96        | 91        | 81        | 3.96        | 35        | 6        | 0.71        | 0        | 6.2         | 4.7         | 33.4        | 121.8        | FEV1<br>SABA                |
|                    |                    | 2    | 10.0       | 3.70        | 85        | 81        | 3.41        | 35        | 7        | 0.30        | 0        | 1.2         | 2.0         | 26.3        | 403.2        |                             |
|                    |                    | 7    | 5.0        | 3.61        | 83        | 80        | 3.71        | 35        | 7        | 0.30        | 2        | 14.2        | 32.4        | 26.5        | 1117.8       |                             |
| 8                  | 5.0                | 3.35 | 77         | 78          | 3.58      | 31        | 6           | 0.43      | 8        | 15.9        | 62.3     | 17.0        | 499.2       |             |              |                             |
| 4                  | V9                 | 1    | 10.0       | 1.78        | 84        | 69        | 1.90        | 30        | 6        | 1.10        | 0        | 2.6         | 4.5         | 13.5        | 333.0        | Cough<br>SABA               |
|                    |                    | 2    | 10.0       | 1.75        | 83        | 66        | 1.75        | 31        | 6        | 1.60        | 0        | 2.7         | 3.1         | 11.3        | 246.0        |                             |
|                    |                    | 8    | 5.0        | 1.67        | 79        | 67        | 1.80        | 31        | 6        | 1.00        | 0        | 1.8         | 45.7        | 21.3        | 408.1        |                             |
|                    |                    | 8.1  | 2.5        | 1.69        | 80        | 67        | 1.66        | 25        | 4        | 2.10        | 4        | 3.2         | 13.3        | 72.4        | 474.5        |                             |
|                    |                    | 9    | 2.5        | 1.76        | 83        | 67        | 1.84        | 25        | 4        | 2.10        | 18       | 2.6         | 25.3        | 46.3        | 624.8        |                             |
| 5                  | V3                 | 1    | 20.0       | 1.94        | 60        | 62        | 2.08        | 29        | 7        | 2.70        | 32       | 7.6         | 35.3        | 41.4        | 238.0        | FEV1<br>SABA                |
|                    |                    | 2    | 20.0       | 1.67        | 51        | 60        | 1.94        | 27        | 6        | 2.60        | 32       | 4.5         | 47.0        | 17.0        | 506.0        |                             |
|                    |                    | 3    | 20.0       | 1.69        | 51        | 62        | 2.27        | 21        | 6        | 3.30        | 38       | 15.9        | 47.0        | 17.0        | 143.0        |                             |

| Subject           | EXAC | V#       | PRED     | FEV1        | F%PD      | FEVVC     | FEV BD      | LKRT      | CGH      | ACQ        | SABA      | TCC         | SEOS       | SNEU        | BEOS          | CRITERIA                                                                                   |
|-------------------|------|----------|----------|-------------|-----------|-----------|-------------|-----------|----------|------------|-----------|-------------|------------|-------------|---------------|--------------------------------------------------------------------------------------------|
| 6                 | V6   | 1        | 5.0      | 1.74        | 67        | 74        | 1.88        | 32        | 7        | 2.30       | 2         | 2.1         | 6.0        | 70.5        | 491.4         | SABA<br>Nocturnal<br>wheeze                                                                |
|                   |      | 2        | 5.0      | 1.57        | 61        | 88        | 1.68        | 32        | 7        | 2.30       | 0         | 3.4         | 1.0        | 26.0        | 423.3         |                                                                                            |
|                   |      | 5        | 2.5      | 1.80        | 70        | 99        | 1.97        | 32        | 7        | 1.30       | 2         | 2.2         | 6.5        | 50.5        | 592.2         |                                                                                            |
|                   |      | 6        | 2.5      | 1.72        | 67        | 91        | 1.89        | 29        | 7        | 2.10       | 8         | 2.7         | 5.0        | 64.0        | 674.5         |                                                                                            |
| 7                 | V5   | 1        | 12.5     | 2.48        | 73        | 64        | 2.75        | 31        | 7        | 1.90       | 5         | 1.0         | 4.6        | 31.7        | 395.6         | FEV1<br>SABA                                                                               |
|                   |      | 2        | 12.5     | 2.20        | 65        | 58        | 2.42        | 28        | 7        | 2.30       | 1         | 3.9         | 4.0        | 51.5        | 198.0         |                                                                                            |
|                   |      | 4        | 12.5     | 2.90        | 86        | 65        | 2.84        | 34        | 7        | 0.86       | 6         | 0.8         | 0.6        | 44.0        | 191.1         |                                                                                            |
|                   |      | 5        | 7.5      | 1.27        | 38        | 41        | 1.33        | 29        | 7        | 3.00       | 30        | 6.3         | 5.3        | 80.0        | 673.2         |                                                                                            |
| 8                 | V10  | 1        | 10.0     | 1.33        | 39        | 37        | 1.33        | 31        | 7        | 3.10       | 22        | 0.2         | 3.2        | 11.8        | 366.3         | FEV1<br>SABA                                                                               |
|                   |      | 2        | 10.0     | 1.41        | 41        | 39        | 1.41        | 29        | 7        | 3.30       | 24        |             |            |             | 280.8         |                                                                                            |
|                   |      | 9        | 2.5      | 1.08        | 32        | 33        | 1.23        | 29        | 6        | 2.40       | 28        | 4.4         | 27.0       | 26.0        | 980.4         |                                                                                            |
|                   |      | 10       | 2.5      | 1.04        | 31        | 31        | 1.04        | 29        | 6        | 2.60       | 43        | 4.6         | 51.0       | 23.0        | 731.0         |                                                                                            |
| 9                 | V7   | 1        | 12.5     | 3.47        | 88        | 69        | 3.63        | 32        | 7        | 1.3        | 2         | 1.0         |            |             | 127.2         | <b>Protocol<br/>violation</b><br>(exacerbated)<br>Nocturnal<br>wheeze, hypo-<br>Adrenalism |
|                   |      | 2        | 12.5     | 3.55        | 90        | 70        | 3.88        | 31        | 7        | 1.6        | 2         | 33          | 0          | 89          | 130.9         |                                                                                            |
|                   |      | 6        | 7.5      | 3.68        | 93        | 73        | 3.87        | 34        | 6        | 1.0        | 2         | 6.9         |            |             | 453.6         |                                                                                            |
|                   |      | 7        | 5.0      | 3.69        | 93        | 75        | 3.89        | 27        | 6        | 1.0        | 4         | 10.7        | 5          | 72.4        | 924.6         |                                                                                            |
| 10                | V8*  | 1        | 5.0      | 2.44        | 87        | 70        | 2.66        | 30        | 7        | 2.7        | 4         | 2.4         | 4.0        | 54.3        | 962.5         | Cough<br>SABA                                                                              |
|                   |      | 2        | 5.0      | 2.35        | 84        | 73        | 2.35        | 32        | 7        | 2.6        | 4         | 3.5         | 3.4        | 49.0        | 608.4         |                                                                                            |
|                   |      | <b>8</b> | <b>0</b> | <b>2.22</b> | <b>80</b> | <b>77</b> | <b>2.49</b> | <b>30</b> | <b>4</b> | <b>1.9</b> | <b>12</b> | <b>26.2</b> | <b>5.7</b> | <b>79.0</b> | <b>1106.0</b> |                                                                                            |
| Mepolizumab<br>11 | V6   | 1        | 10.0     | 1.27        | 65        | 75        | 1.22        | 32        | 7        | 1.10       | 2         | 1.4         | 6.0        | 36.3        | 553.5         | <b>Withdrawn by PI</b><br><b>(adverse event)</b><br>No exacerbation                        |
|                   |      | 2        | 10.0     | 1.14        | 58        | 75        | 1.23        | 29        | 7        | 1.60       | 2         | 0.8         |            |             | 335.8         |                                                                                            |
|                   |      | 5        | 7.5      | 1.30        | 67        | 79        | 1.34        | 31        | 6        | 1.40       | 4         | 5.8         | 2.0        | 13.0        | 24.0          |                                                                                            |
|                   |      | 6        | 7.5      | 1.34        | 69        | 76        | 1.32        | 34        | 7        | 1.70       | 2         | 6.9         | 0.3        | 36.7        | 10.4          |                                                                                            |
| 12                | V5   | 1        | 7.5      | 1.11        | 44        | 60        | 1.57        | 24        | 6        | 4.1        | 8         | 1.2         | 1.6        | 25.2        | 510.6         | <b>Protocol<br/>violation</b><br>(exacerbated)<br>FEV1<br>SABA                             |
|                   |      | 2        | 7.5      | 1.47        | 59        | 68        | 1.77        | 24        | 6        | 3.3        | 8         | 0.2         | 1.0        | 55.0        | 262.2         |                                                                                            |
|                   |      | 4        | 7.5      | 1.48        | 59        | 62        | 1.45        | 24        | 5        | 3.3        | 18        |             |            |             | 78.4          |                                                                                            |
|                   |      | 5        | 5.0      | 0.87        | 35        | 59        | 1.03        | 10        | 5        | 4.4        | 20        | 30.6        | 0.7        | 90.6        | 12.1          |                                                                                            |

Table 4A (online). Sputum differential cell counts before and after treatment with mepolizumab in the subgroup of patients with sputum eosinophilia at baseline.

| Variables                      | Visit 1<br>Baseline | Visit 4<br>4weeks post<br>First dose | Visit 12<br>4weeks post<br>Last dose | Visit 14<br>8 weeks post<br>Last dose |
|--------------------------------|---------------------|--------------------------------------|--------------------------------------|---------------------------------------|
| N                              | 8                   | 8                                    | 7                                    | 7                                     |
| Viability, %                   | 50.4 (11.00)        | 51.8 (18.95)                         | 56.2 (29.41)                         | 63.7 (17.03)                          |
| TCC, x10 <sup>6</sup> cells/ml | 6.6 (7.23)          | 5.0 (6.54)                           | 2.3 (2.20)                           | 5.0 (3.88)                            |
| Eosinophils, % *               | 18.8 (6.0-54.3)     | 0.0 (0.0-4.0)**                      | 1.3 (0.0-11.3)**                     | 0.3 (0.0-4.6)**                       |
| Neutrophils, %                 | 45.0 (17.56)        | 57.7 (7.26)                          | 58.9 (22.47)                         | 54.0 (30.39)                          |
| Macrophages, %                 | 28.4 (18.44)        | 37.5 (7.46)                          | 36.6 (23.98)                         | 42.1 (30.60)                          |
| Lymphocytes, %                 | 2.0 (2.73)          | 1.4 (0.82)                           | 0.2 (0.45)**                         | 2.1 (2.38)                            |
| Epithelial cells, %            | 1.0 (1.39)          | 2.7 (3.48)                           | 1.1 (1.26)                           | 0.3 (0.39)                            |

Data expressed as mean and SD, \*median (min-max) \*\*p<0.05 compared to baseline

Table 4B (online). Sputum differential cell counts before and after treatment with placebo in the subgroup of patients with sputum eosinophilia at baseline.

| Variables                      | Visit 1<br>Baseline | Visit 4<br>4weeks post<br>First dose | Visit 12<br>4weeks post<br>Last dose | Visit 14<br>8 weeks post<br>Last dose | Exacerbation    | 4 weeks post<br>Exacerbation |
|--------------------------------|---------------------|--------------------------------------|--------------------------------------|---------------------------------------|-----------------|------------------------------|
| N                              | 10                  | 9                                    | 2                                    | 2                                     | 8               | 8                            |
| Viability, %                   | 65.6 (16.13)        | 51.1 (10.81)                         | 62.9 (4.03)                          | 48.1 (9.12)                           | 47.4 (22.40)    | 72.6 (21.65)                 |
| TCC, x10 <sup>6</sup> cells/ml | 3.4 (2.43)          | 5.0 (5.46)                           | 2.4 (2.05)                           | 2.1 (0.64)                            | 9.1 (5.85)      | 4.0 (4.06)                   |
| Eosinophils, % *               | 4.3 (3.2-35.3)      | 5.3 (0.6-16.3)                       | 5.3 (1.3-5.0)                        | 5.0 (1.0-9.0)                         | 25.3 (5.0-63.7) | 3.8 (2.0-41.4)               |
| Neutrophils, %                 | 46.5 (23.98)        | 59.0 (17.59)                         | 58.5 (9.97)                          | 60.8 (27.15)                          | 41.7 (23.59)    | 54.5 (31.09)                 |
| Macrophages, %                 | 43.9 (24.90)        | 33.6 (17.12)                         | 34.5 (9.19)                          | 29.9 (22.42)                          | 24.4 (9.54)     | 35.1 (26.01)                 |
| Lymphocytes, %                 | 1.3 (1.45)          | 0.9 (0.97)                           | 1.9 (1.98)                           | 2.7 (1.41)                            | 0.7 (0.81)      | 0.8 (0.77)                   |
| Epithelial cells, %            | 0.9 (1.27)          | 0.9 (1.20)                           | 2.0 (1.41)                           | 1.7 (2.33)                            | 0.2 (0.16)      | 1.1 (2.02)                   |

Data expressed as mean and SD, \*median (min-max)

Table 4C (online). Blood differential cell counts before and after treatment with mepolizumab in the subgroup of patients with sputum eosinophilia at baseline.

| Variables                         | Visit 1<br>Baseline | Visit 4<br>4weeks post<br>First dose | Visit 12<br>4weeks post<br>Last dose | Visit 14<br>8 weeks post<br>Last dose |
|-----------------------------------|---------------------|--------------------------------------|--------------------------------------|---------------------------------------|
| N                                 | 8                   | 8                                    | 7                                    | 7                                     |
| Lymphocytes (x10 <sup>6</sup> /L) | 1.94 (1.05)         | 1.51 (0.63)                          | 1.82 (0.67)                          | 1.65 (0.64)                           |
| Monocytes (x10 <sup>6</sup> /L)   | 0.59 (0.24)         | 0.51 (0.25)                          | 0.76 (0.24)                          | 0.74 (0.21)                           |
| Neutrophils (x10 <sup>6</sup> /L) | 7.58 (3.94)         | 8.30 (3.70)                          | 5.94 (2.31)                          | 6.37 (3.03)                           |
| Eosinophils (x10 <sup>6</sup> /L) | 0.68 (0.52)         | 0.05 (0.04)**                        | 0.07 (0.04)**                        | 0.07 (0.04)**                         |
| Basophils (x10 <sup>6</sup> /L)   | 0.07 (0.04)         | 0.04 (0.03)                          | 0.05 (0.02)                          | 0.05 (0.03)                           |

Data expressed as mean and SD, \*\*p<0.05 compared to baseline

Table 4D (online). Blood differential cell counts before and after treatment with placebo in the subgroup of patients with sputum eosinophilia at baseline.

| Variables                         | Visit 1<br>Baseline | Visit 4<br>4weeks post<br>First dose | Visit 12<br>4weeks post<br>Last dose | Visit 14<br>8 weeks post<br>Last dose | Exacerbation |
|-----------------------------------|---------------------|--------------------------------------|--------------------------------------|---------------------------------------|--------------|
| N                                 | 10                  | 9                                    | 2                                    | 2                                     | 8            |
| Lymphocytes (x10 <sup>6</sup> /L) | 1.96 (0.96)         | 1.48 (0.30)                          | 2.61 (0.50)                          | 2.48 (0.34)                           | 1.51 (0.26)  |
| Monocytes (x10 <sup>6</sup> /L)   | 0.55 (0.23)         | 0.54 (0.18)                          | 0.56 (0.14)                          | 0.52 (0.08)                           | 0.61 (0.18)  |
| Neutrophils (x10 <sup>6</sup> /L) | 7.29 (2.42)         | 8.58 (2.38)                          | 4.13 (0.78)                          | 4.67 (0.07)                           | 5.77 (2.49)  |
| Eosinophils (x10 <sup>6</sup> /L) | 0.37 (0.26)         | 0.32 (0.20)                          | 0.66 (0.41)                          | 1.22 (1.38)                           | 0.62 (0.25)  |
| Basophils (x10 <sup>6</sup> /L)   | 0.06 (0.03)         | 0.05 (0.02)                          | 0.04 (0.01)                          | 0.05 (0.02)                           | 0.08 (0.06)  |

Data expressed as mean and SD

Figure 1 (online). Sub-group analysis of patients with baseline eosinophilia: Time to exacerbation after randomization into study treatment (n=8) or placebo (n=10). None of the patients in the active arm exacerbated (one was withdrawn due to an adverse event). Eight out of 10 patients who received placebo had exacerbation associated with eosinophilia.

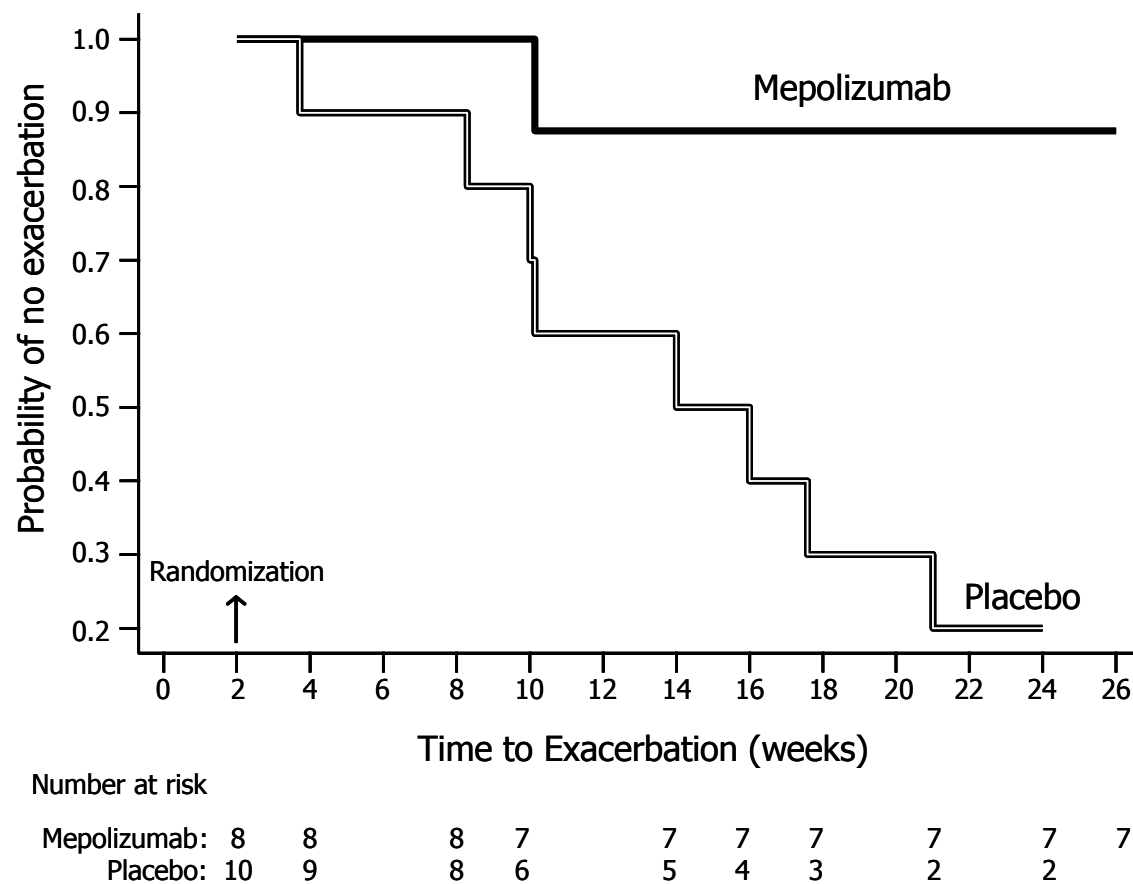

Figure 2 (online): correlation between blood eosinophils and sputum eosinophils at the beginning and at the end of the study in the subgroup of patients with sputum eosinophilia at baseline. Closed circles represent treatment with mepolizumab and the open circles represent placebo.

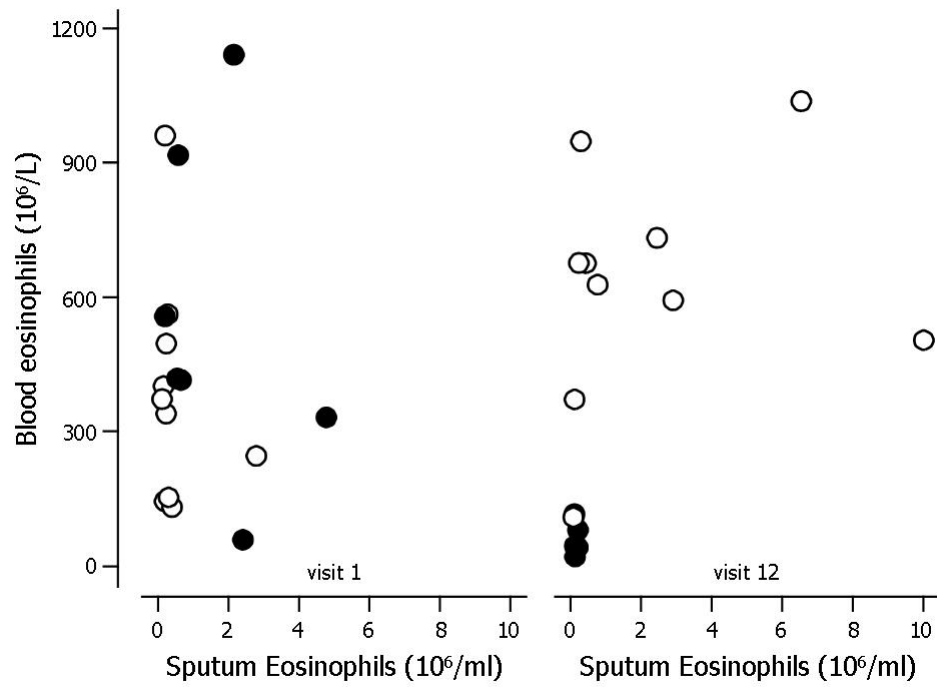

Figure 3a (online): Changes in FEV<sub>1</sub> (L) before and after treatment with mepolizumab or placebo in the subgroup with sputum eosinophilia at baseline

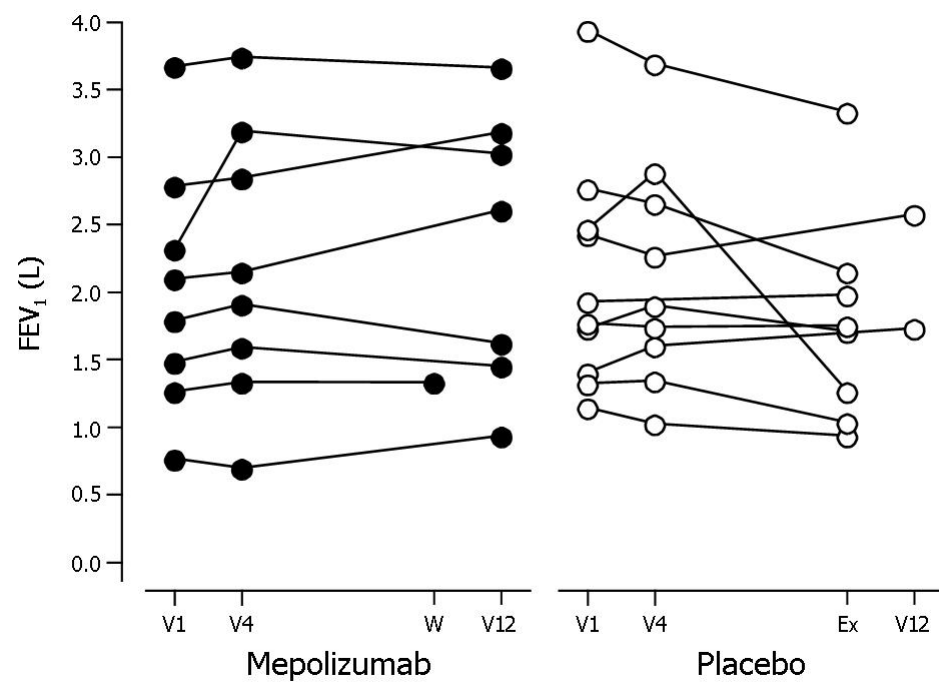

Figure 3b (online): Changes in FEV<sub>1</sub> (% predicted) before and after treatment with mepolizumab or placebo in the subgroup of patients with sputum eosinophilia.

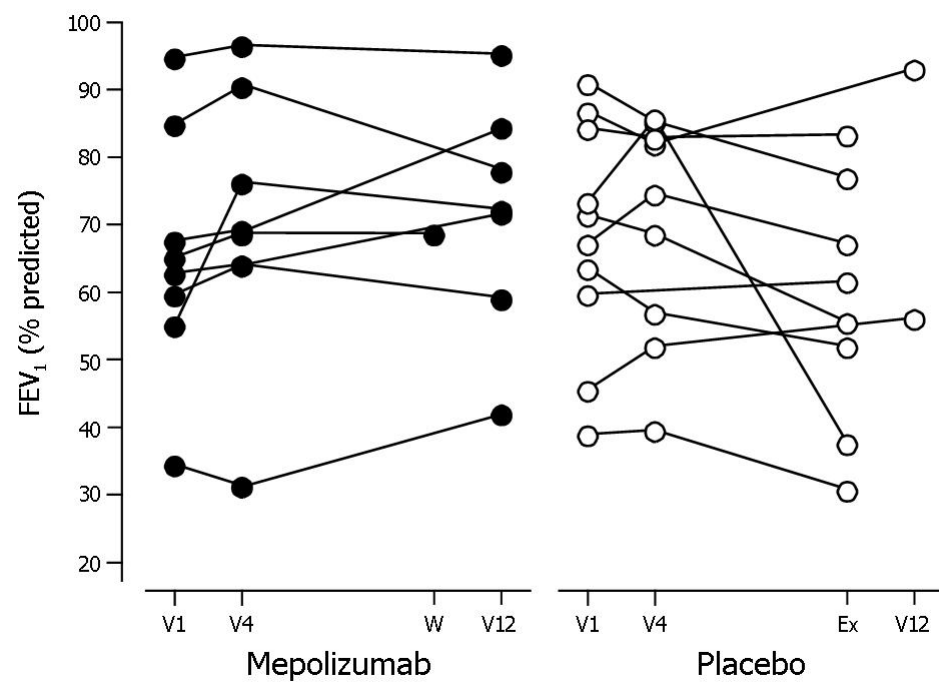

Figure 3c (online): Changes in ACQ before and after treatment with mepolizumab or placebo in the subgroup with sputum eosinophilia at baseline.

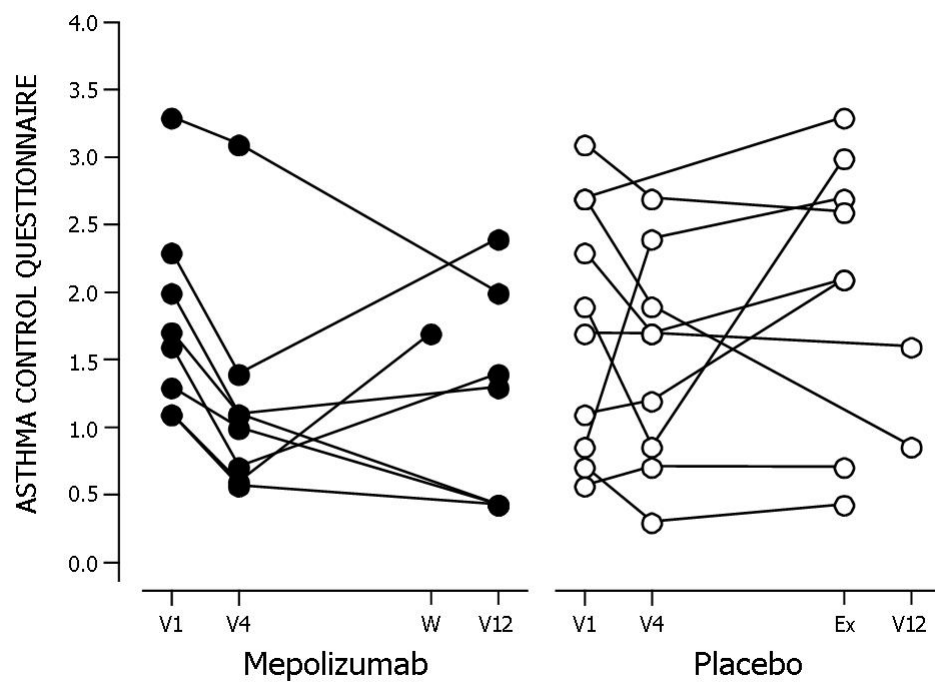

Supplement: nejm_nair_985sa1.pdf [file nejm_nair_985sa1.pdf]
